# Supplementary material for: Insulin and IGF-1 have both overlapping and distinct effects on CD4+ T cell mitochondria, metabolism, and function
Source: PubMed Central journal article supplement (PMC10881490; doi:10.1038/s41598-024-54836-w), 2024-02-21
Supplement: 41598_2024_54836_MOESM1_ESM.pdf [file 41598_2024_54836_MOESM1_ESM.pdf]

## Supplementary Figure S1

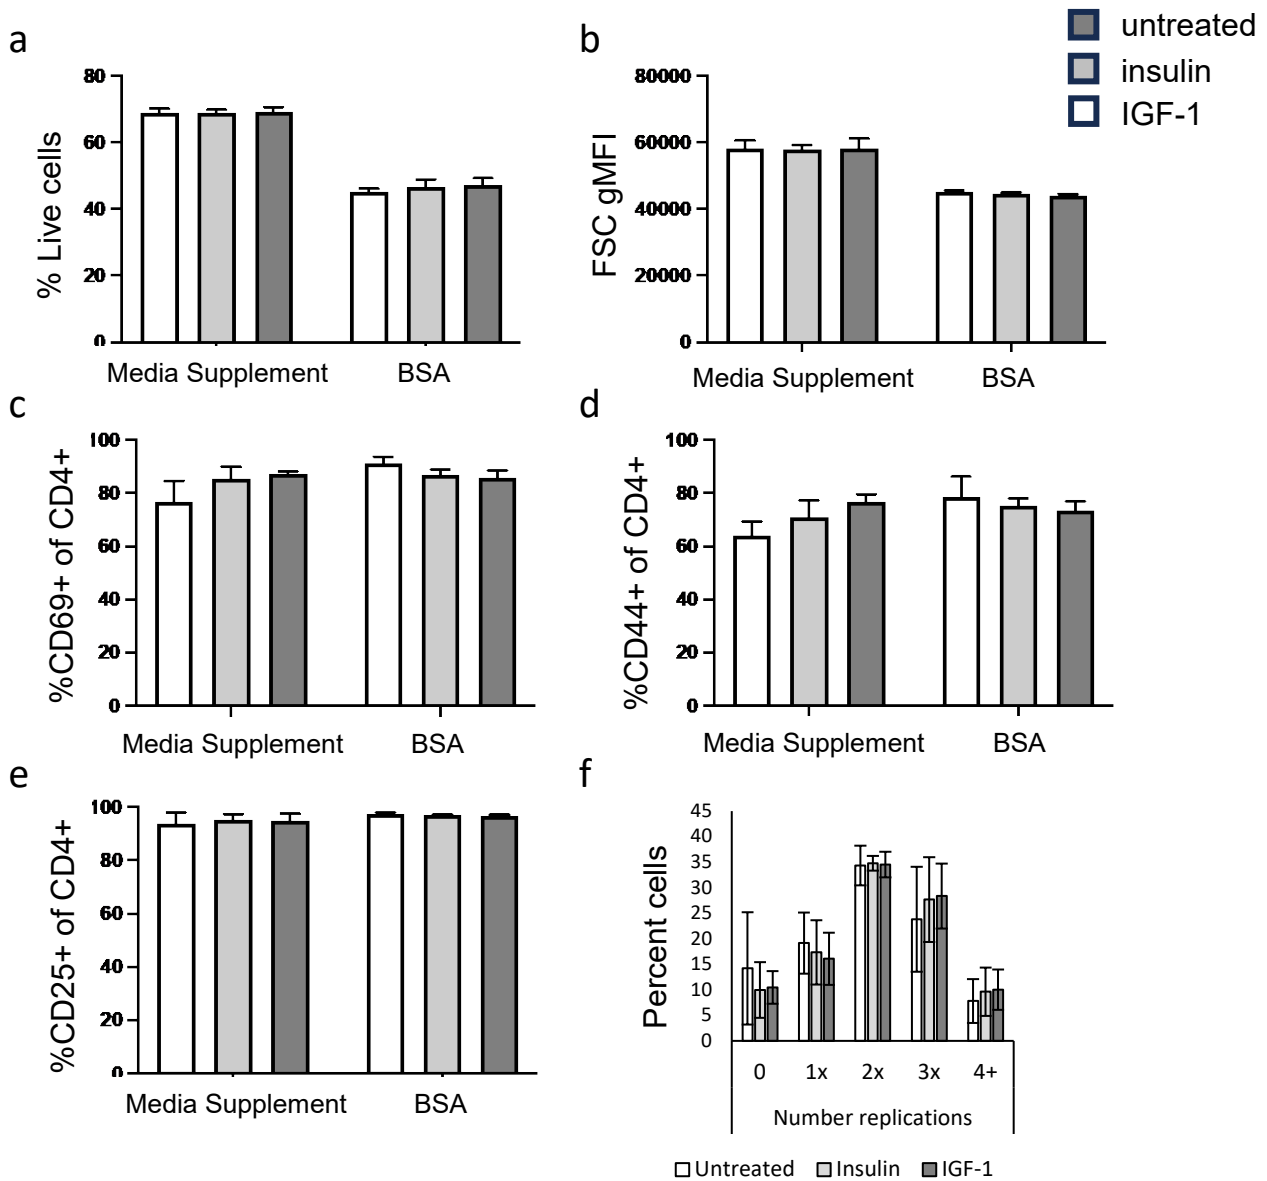

**Supplementary Figure S1. Insulin and IGF-1 treatment do not impact CD4<sup>+</sup> T cell viability, cell size, activation marker expression, or proliferation.** (a-e) CD4<sup>+</sup> T cells were activated for 48 hours on anti-CD3/CD28 coated plates in media supplemented with either Insulin Free Media Supplement or 0.35% BSA and treated with insulin or IGF-1 for the last 24 hours of activation. Viability assessed by flow cytometry viability dye staining (a). Cell size determined by FSC-A geometric mean fluorescent intensity (b). Activation marker expression measured by flow cytometry for CD69 (c), CD44 (d), and CD25 (e). (f) CD4<sup>+</sup> T cells were stained with CellTrace Violet and activated for 72 hours on anti-CD3/CD28 coated plates in serum free media supplemented with Insulin Free Media Supplement and treated with insulin or IGF-1. Proliferation assessed by flow cytometry. Data representative of at least 2 independent experiments; n=3 mice per experiment. Data analyzed using student's t-test; no significant differences found.

## Supplementary Figure S2

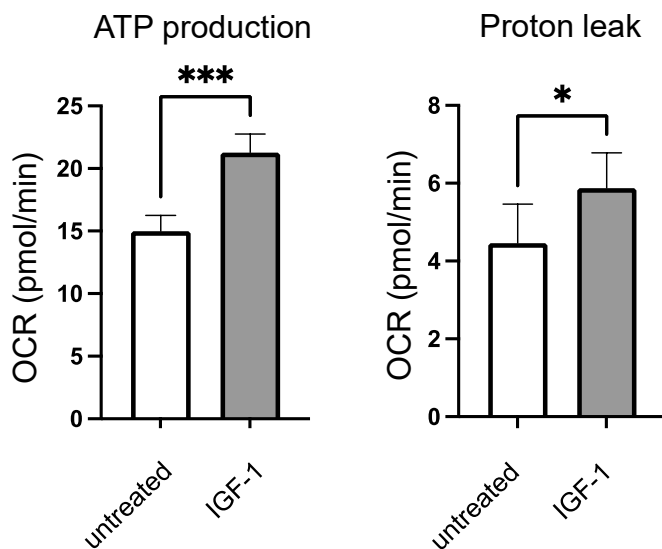

**Supplementary Figure S2. IGF-1 effects on Th17 metabolism.** CD4<sup>+</sup> T cells from C57BL/6 mice were differentiated *in vitro* to Th17 cells in media supplemented with Insulin Free Media Supplement for three days, and then treated with or without IGF-1 (50ng/mL) for an additional 48 hours. Extracellular flux analysis and Seahorse Mito Stress test were used to measure ATP production and protein leak. n=5-7 mice/group. Data analyzed using student's t test (\*p<0.05; \*\*\*p<0.001).

## Supplementary Figure S3

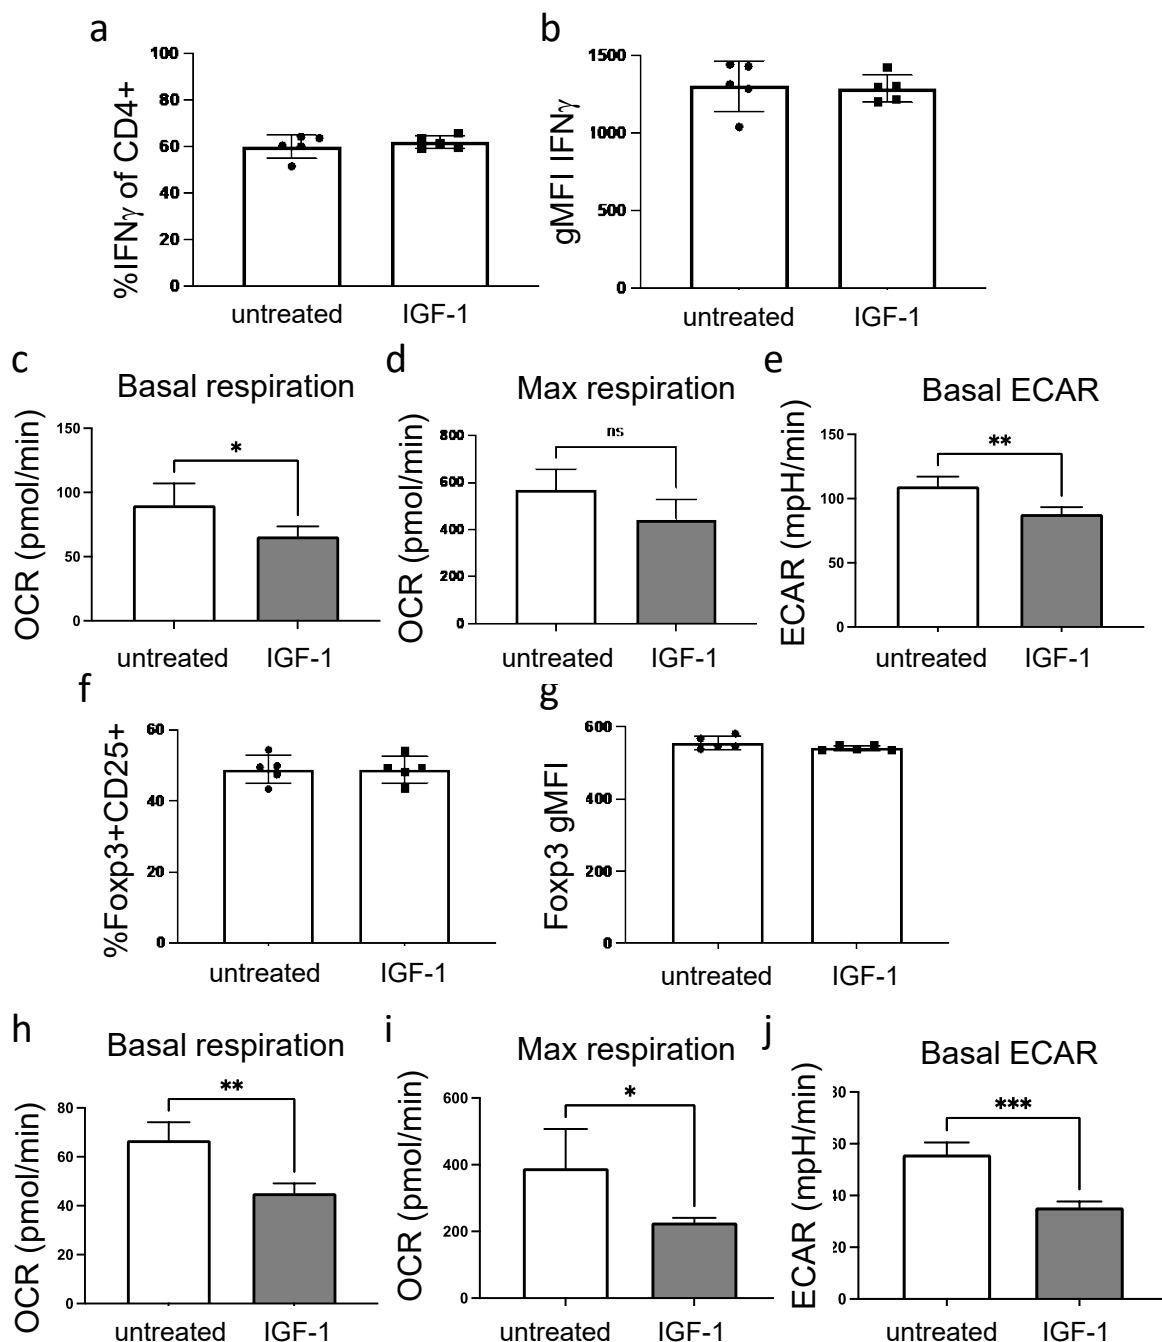

**Supplementary Figure S3. IGF-1 effects on Th1 and Treg cell function and metabolism.** CD4<sup>+</sup> T cells from C57BL/6 mice were differentiated *in vitro* to Th1 or Treg cells in media supplemented with Insulin Free Media Supplement for three days, and then treated with or without IGF-1 (50ng/mL) for an additional 48 hours. **(a-b)** Th1 cells were analyzed by flow cytometry for percent IFN- $\gamma$  positive cells *(a)* and IFN- $\gamma$  expression by MFI *(b)*. **(c-e)** Extracellular flux analysis was used to measure Th1 cell basal OCR, max OCR, and ECAR. **(f-g)** Treg cells were analyzed by flow cytometry for percent Foxp3<sup>+</sup>CD25<sup>+</sup> positive cells *(f)* and Foxp3 expression by MFI *(g)*. **(h-j)** Extracellular flux analysis was used to measure basal OCR, max OCR, and ECAR. Data representative of 2 independent experiments. n=4-5 mice per experiment. Data analyzed using student's t test (\*p<0.05; \*\*p<0.01, \*\*\*p<0.001).

## Supplementary Figure S4

Insulin receptor

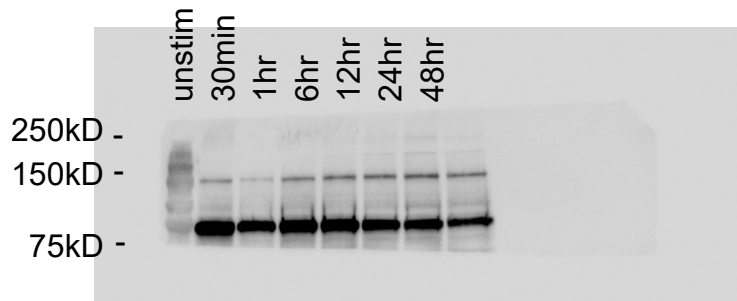

IGF1-R

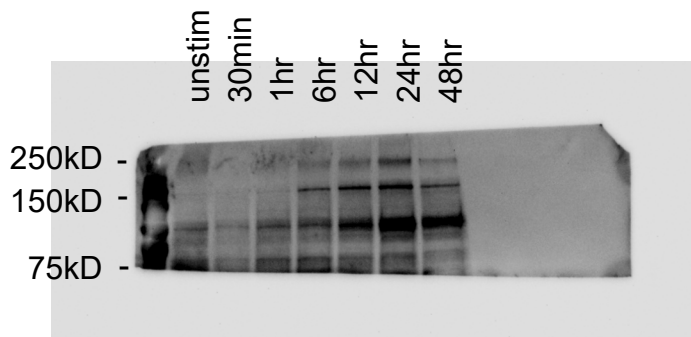

Actin

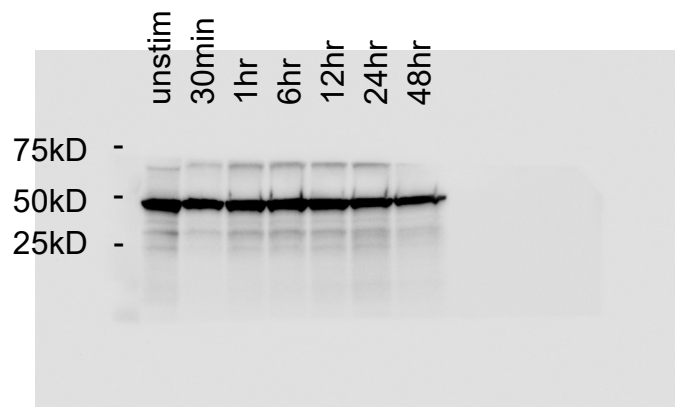

**Supplementary Figure S4. Original blots used to prepare Figure 1C.** IR and IGF-1R blots were stripped and reprobed; blot cut around 75kD, actin processed in parallel on the ~15-75kD strip of the blot.

## Supplementary Figure S5

Insulin Receptor:

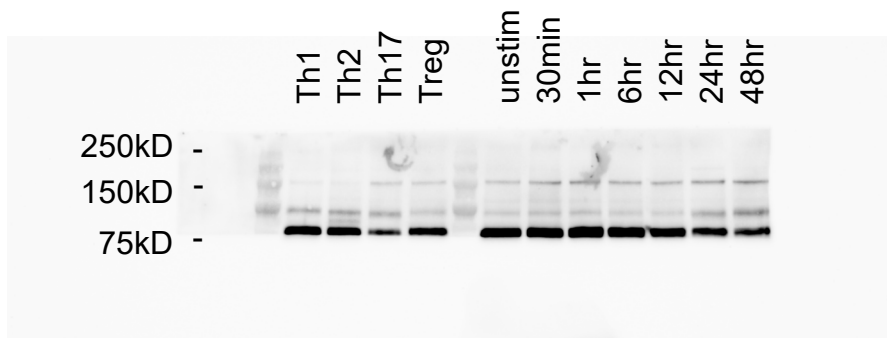

IGF-1R:

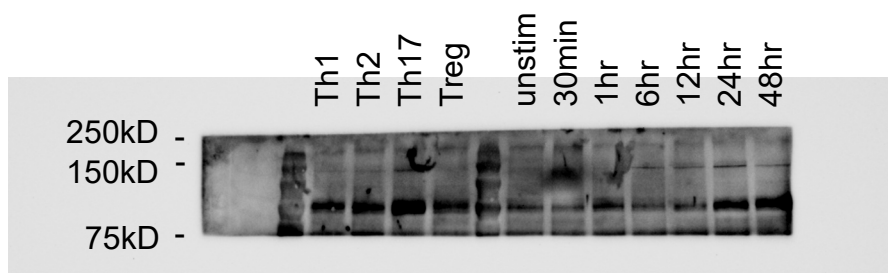

Actin:

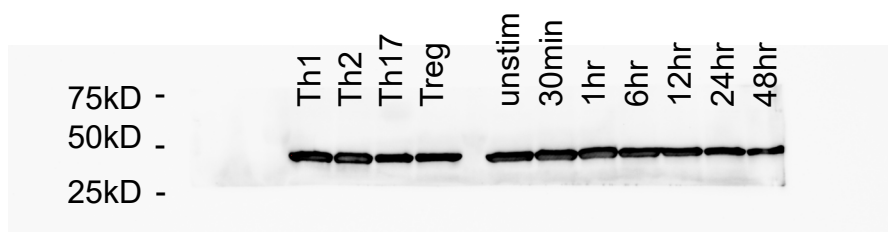

**Supplementary Figure S5. Original blots used to prepare Figure 1F.** IR and IGF-1R blots were stripped and reprobbed; blot cut around 75kD, actin processed in parallel on the ~15-75kD strip of the blot.
